# Supplementary material for: Composition and dosage of a multipartite enhancer cluster control developmental expression of Ihh (Indian hedgehog)
Source: Springer Nature journal article supplement (doi:10.1038/ng.3939), 2017-08-28
Supplement: ng.3939-S1.pdf [file ng.3939-S1.pdf]

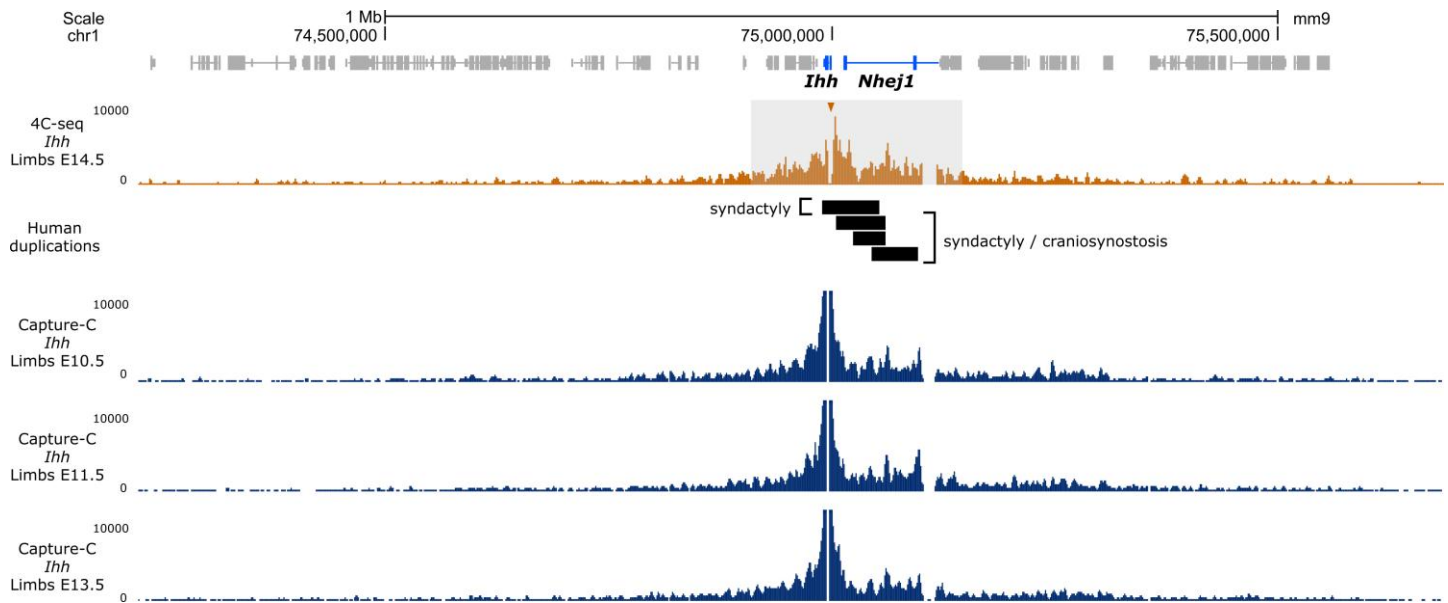

### Supplementary Figure 1

#### *Ihh* interacts preferentially with its upstream neighboring gene *Nhej1*.

Genes are indicated by gray lines, and *Ihh* and *Nhej1* are highlighted in blue. 4C-seq performed in E14.5 limbs using the *Ihh* promoter as the viewpoint is shown below. Note the increased interactions with intron 3 of the adjacent *Nhej1* gene. The gray line indicates the zoomed region displayed in **Figure 1**. Black bars indicate the size and position of human duplications converted to mouse genome coordinates that overlap with the regulatory landscape of *Ihh*. Below, Capture-C data from Andrey *et al.* (2017) at different developmental time points. Chromatin organization is maintained during limb development.

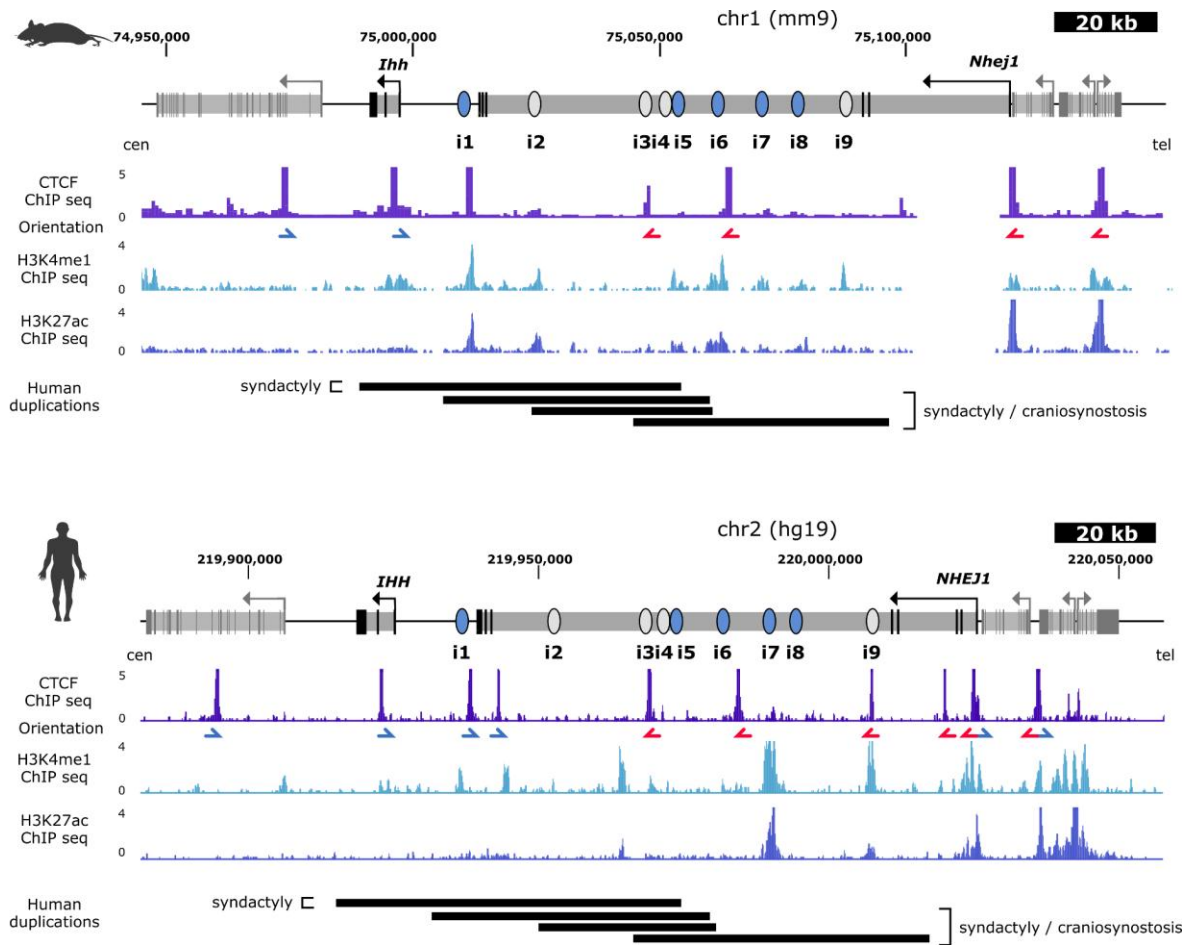

**Supplementary Figure 2**

**Conservation of the *IHH* locus between mouse and human.**

The upper panel shows a representation of the mouse locus with positions indicated for the genes and regulatory elements investigated (blue and gray ovals). Below, ChIP-seq tracks for CTCF with corresponding motif orientation as well as ChIP-seq tracks for active enhancer elements (H3K4me1 and H3K27ac); all experiments were performed in developing limbs at E14.5 (ENCODE). The equivalent positions of human pathogenic duplications are shown at the bottom. The lower panel shows a representation of the human locus with the positions of genes and equivalent positions of the regulatory elements investigated in mouse (blue and gray ovals). Below, ChIP-seq tracks for CTCF with corresponding motif orientation as well as ChIP-seq tracks for active enhancer elements (H3K4me1 and H3K27ac); all are ENCODE data sets for osteoblasts. Note that the convergent orientation of CTCF at the locus is conserved between mouse and human, as well as the presence of active enhancers. The equivalent positions of human pathogenic duplications are shown at the bottom.

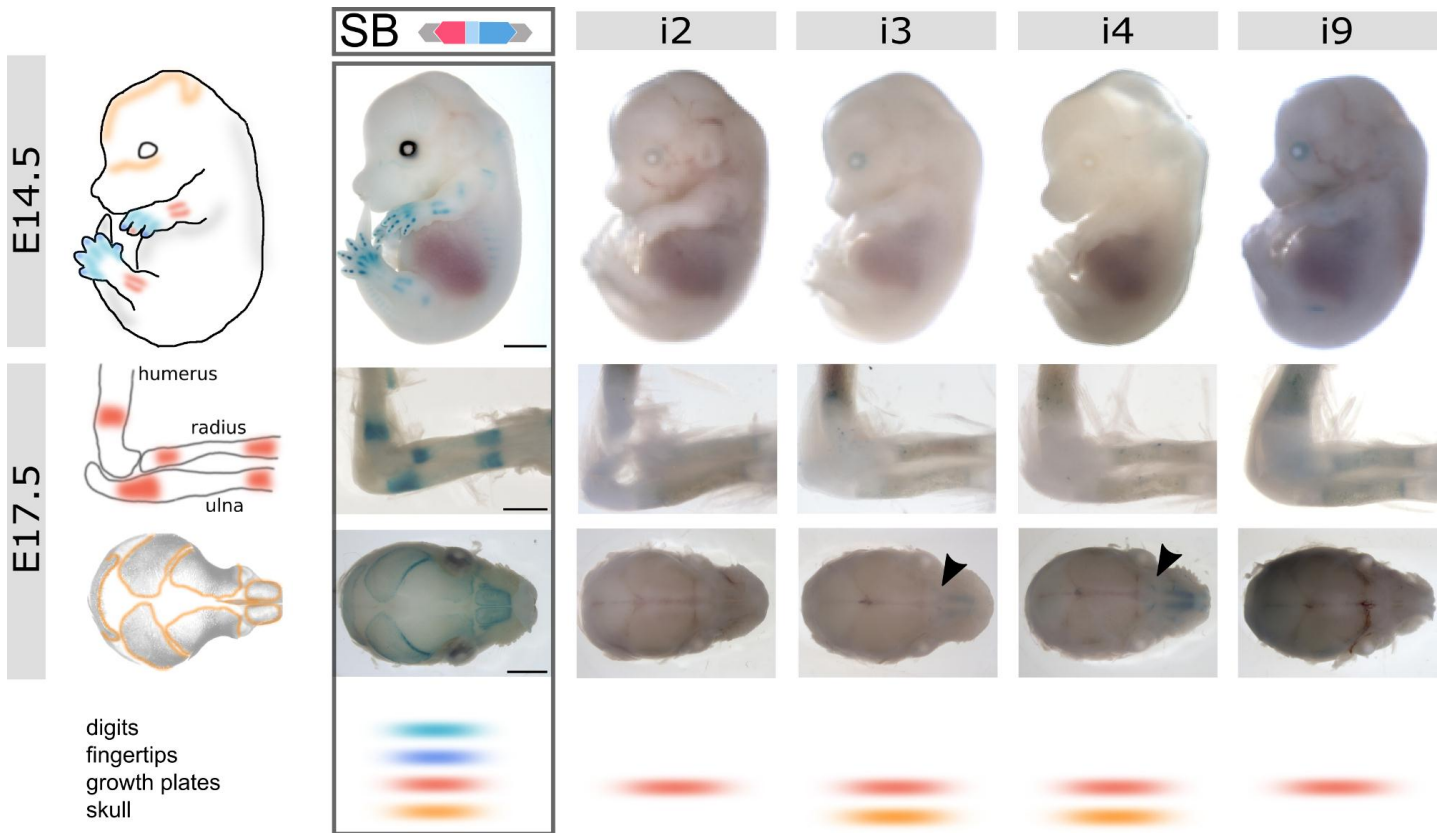

**Supplementary Figure 3**

**Transgenic reporter assay (LacZ) of elements positive at E17.5.**

Each element displays a lateral view of the embryo at E14.5 (scale bar, 2,000 μm), a dorsal view of the forelimbs (scale bar, 1,000 μm) and a top view of the skull at 17.5 (scale bar, 2,000 μm) together with tissue specificity scoring (bottom). All tested elements appear positive at E17.5 but not at E14.5 and are marked in **Figure 1** in gray. An arrowhead indicates positive staining in the skull. The regulatory activity of the region as indicated by the inserted *lacZ* reporter (SB; black outline) is also displayed.

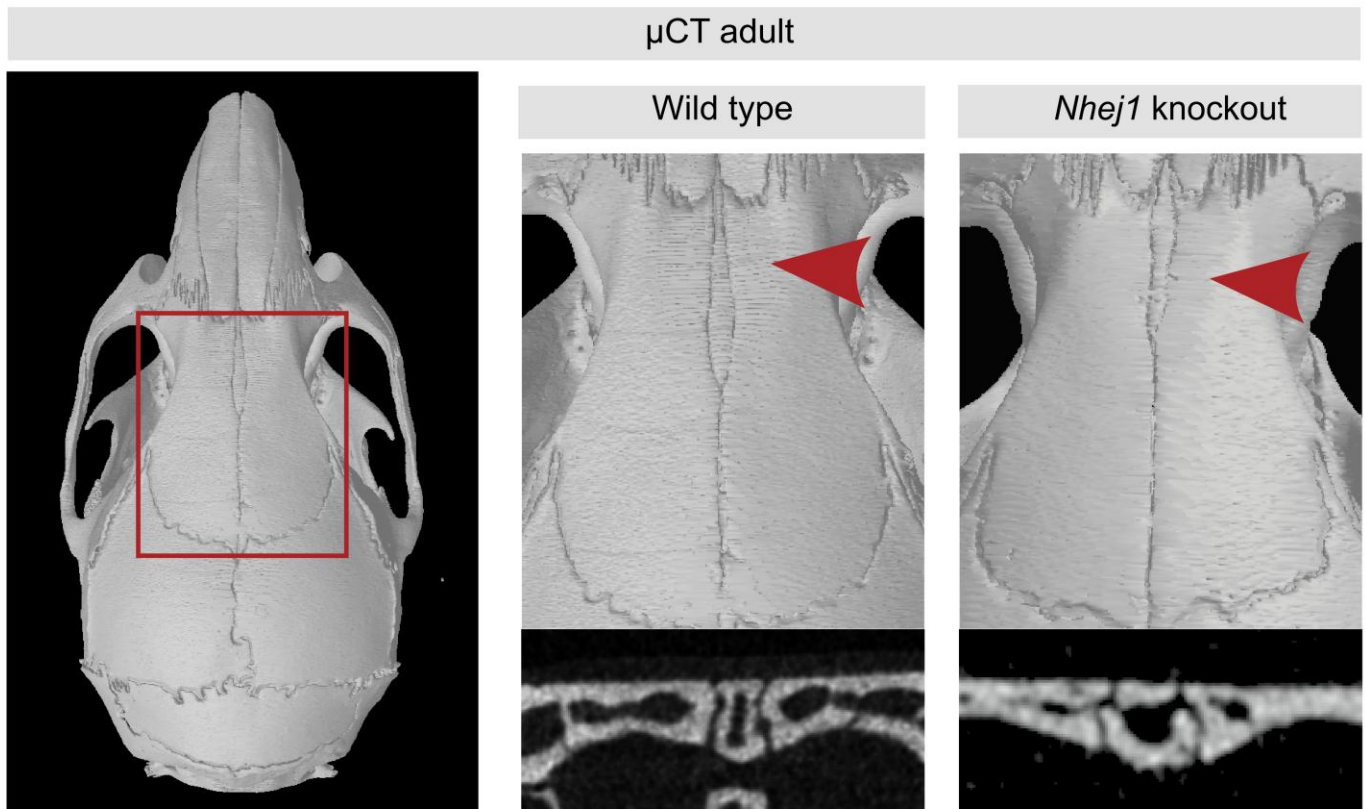

**Supplementary Figure 4**

***Nhej1*-knockout mice have normal skulls.**

μCT analysis of adult skulls. The red square indicates enlargement of the metopic suture region, shown on the right. An enlargement of the corresponding cross-section (red arrow) of the metopic sutures is shown below. Note the normal development of sutures in *Nhej1*-knockout mice as compared to wild-type controls.

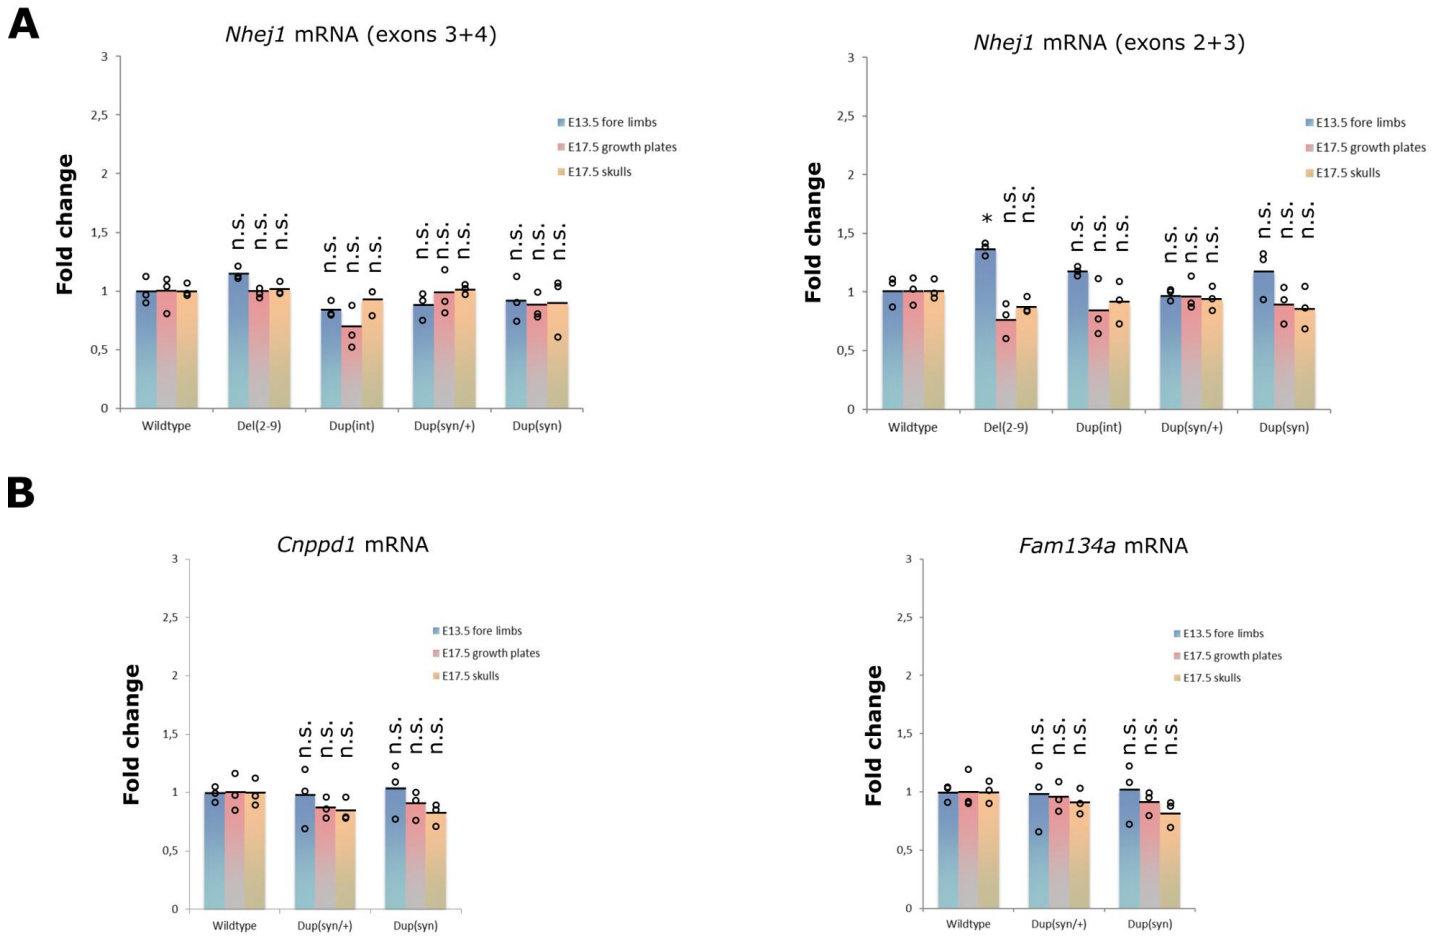

### Supplementary Figure 5

#### Quantitative expression analysis (qPCR) of mutants at different tissues and stages.

(a) Expression analysis of *Nhej1*. Note that manipulations of the intronic region of the *Nhej1* gene do not cause alterations in expression levels overall. (b) Expression analysis of *Cnppd1* and *Fam134a*. Note that the increased contacts observed in 4C-seq experiments for Dup(syn) mutants (Fig. 4b, asterisk) do not cause any alteration in the expression levels of the genes. Bars represent the mean of  $n = 3$  different individuals (circles). Two-sided Student's  $t$  test,  $*P < 0.05$ ; ns, not significant.

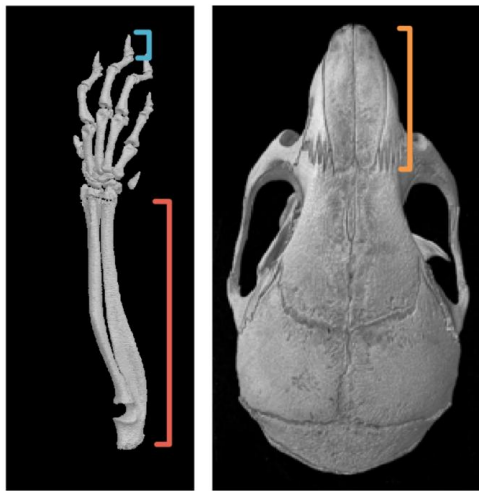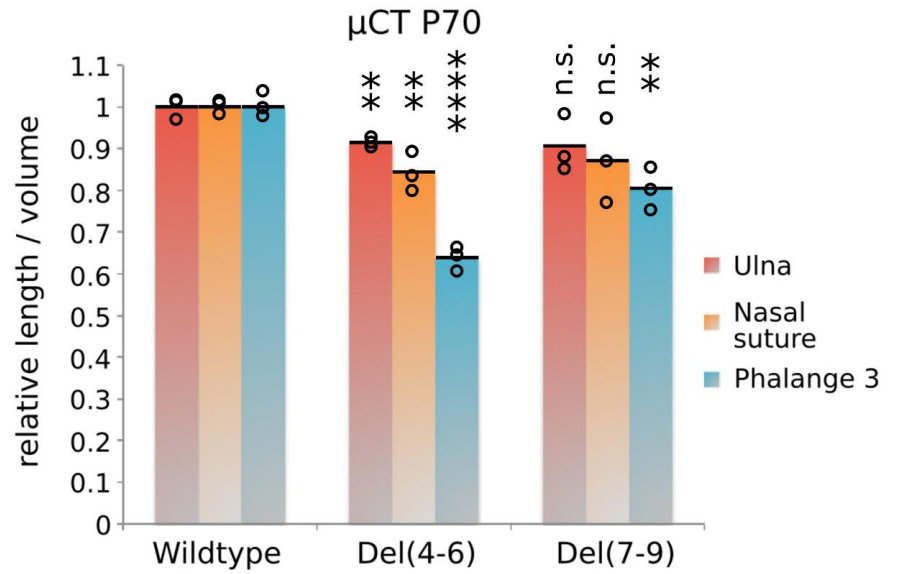

### Supplementary Figure 6

#### Enhancer deletions result in delayed skull ossification and reduced bone length.

Left,  $\mu$ CT scan of wild-type mouse forelimb and skull displaying the different regions used for measurement. Right, bone measurements for Del(4–6) and Del(7–9) mutants and wild-type age-matched controls (P70). Note the reduction in ulna and nasal suture length for Del(4–6). Del(4–6) shows a more severe effect on digit length than that observed in Del(7–9) mutants. Bars represent the mean of  $n = 3$  different individuals (circles). Two-sided Student's  $t$  test, \* $P < 0.05$ ; \*\* $P < 0.01$ ; \*\*\* $P < 0.001$ ; \*\*\*\* $P < 0.0001$ ; ns, not significant.

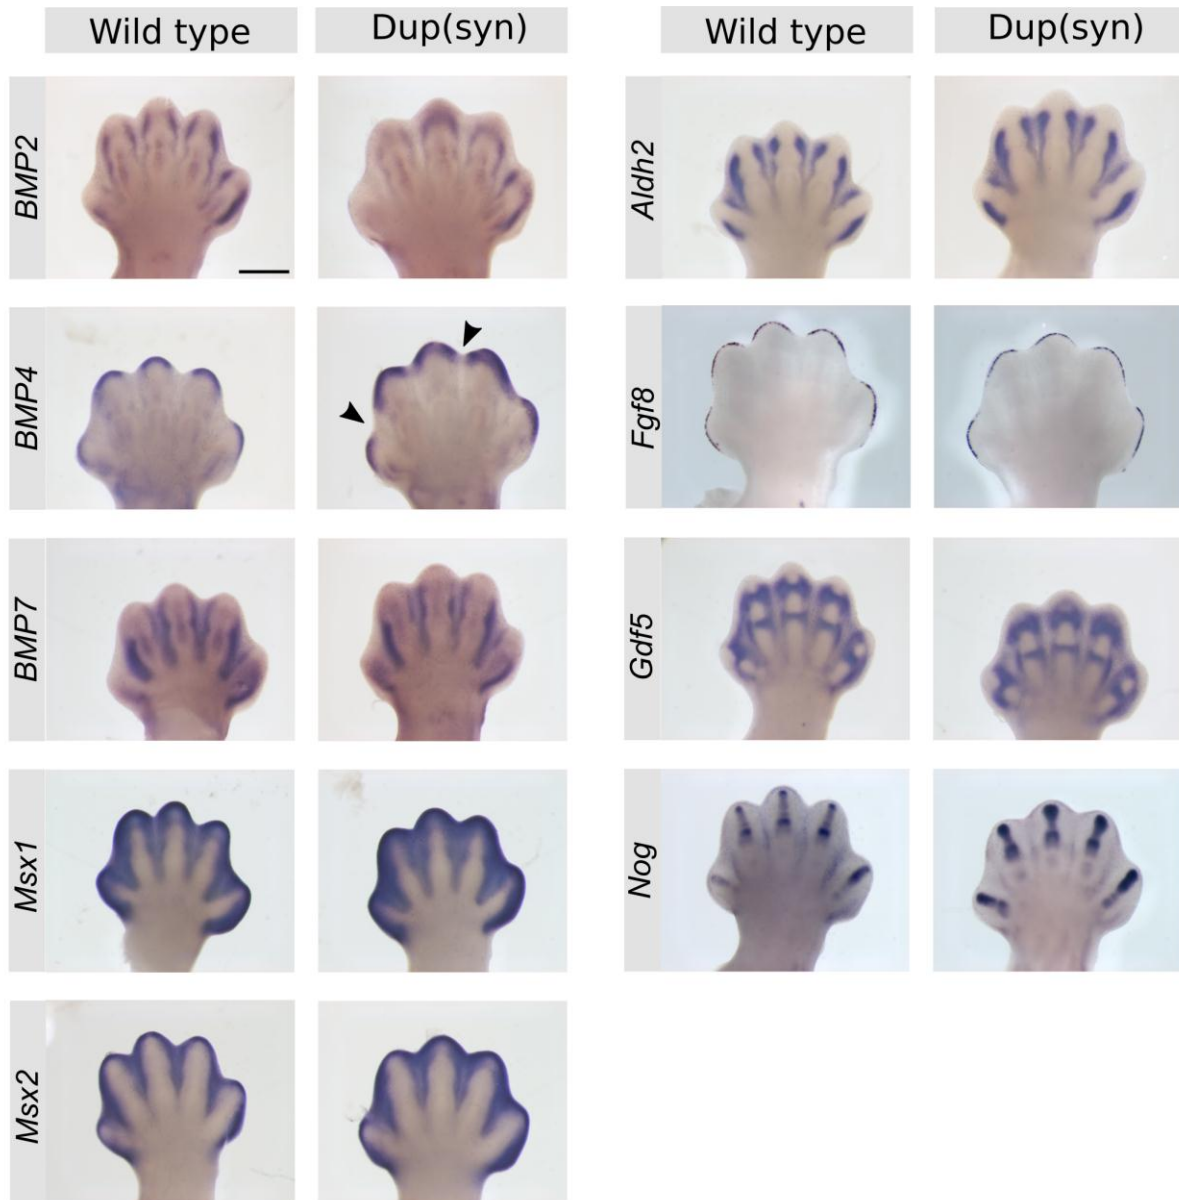

**Supplementary Figure 7**

**Expression analysis of genes involved in syndactyly/interdigital cell death.**

*In situ* hybridization analysis were performed in E14.5 forelimbs from Dup(syn)/+ mutants and corresponding wt controls. Note increased expression for *Bmp4* and *Nog* as well as expansion of *Bmp4* expression in the interdigital space (arrows). Bars represent 200µm.

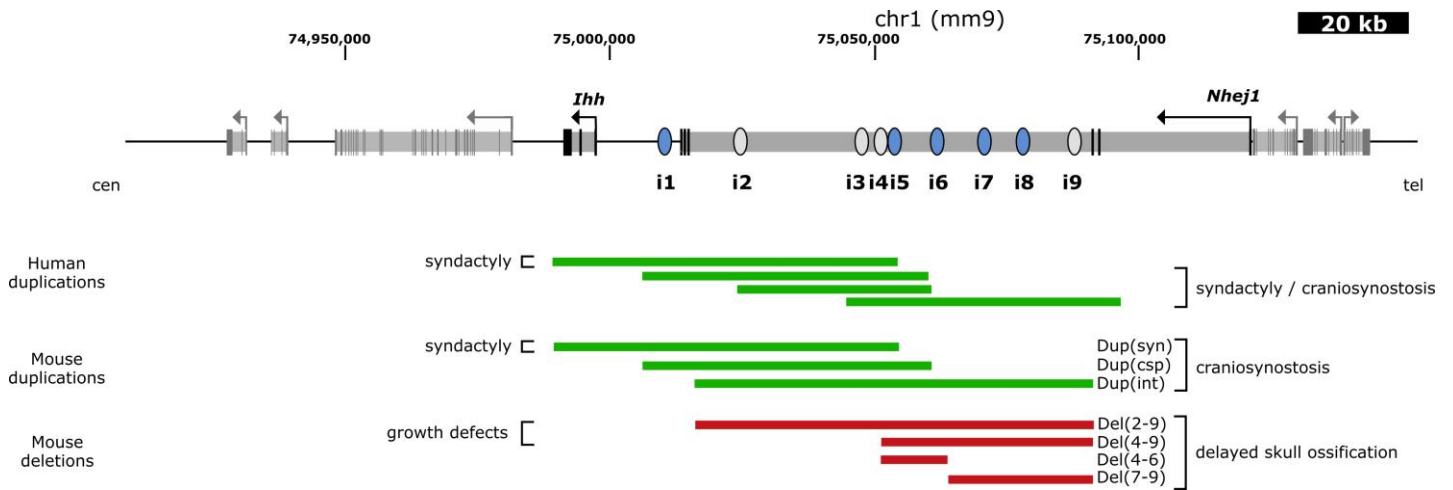

### Supplementary Figure 8

#### Pathogenic structural variants associated to the *Ihh* locus.

Schematic of the mouse locus with coordinates of structural variants indicated by colored bars and associated phenotypes. Positions of human duplications were transformed to the mouse genome. Enhancer elements are displayed with ovals. Duplications are depicted in green and deletions in red. All human variants are heterozygous, all mouse variants are homozygous.



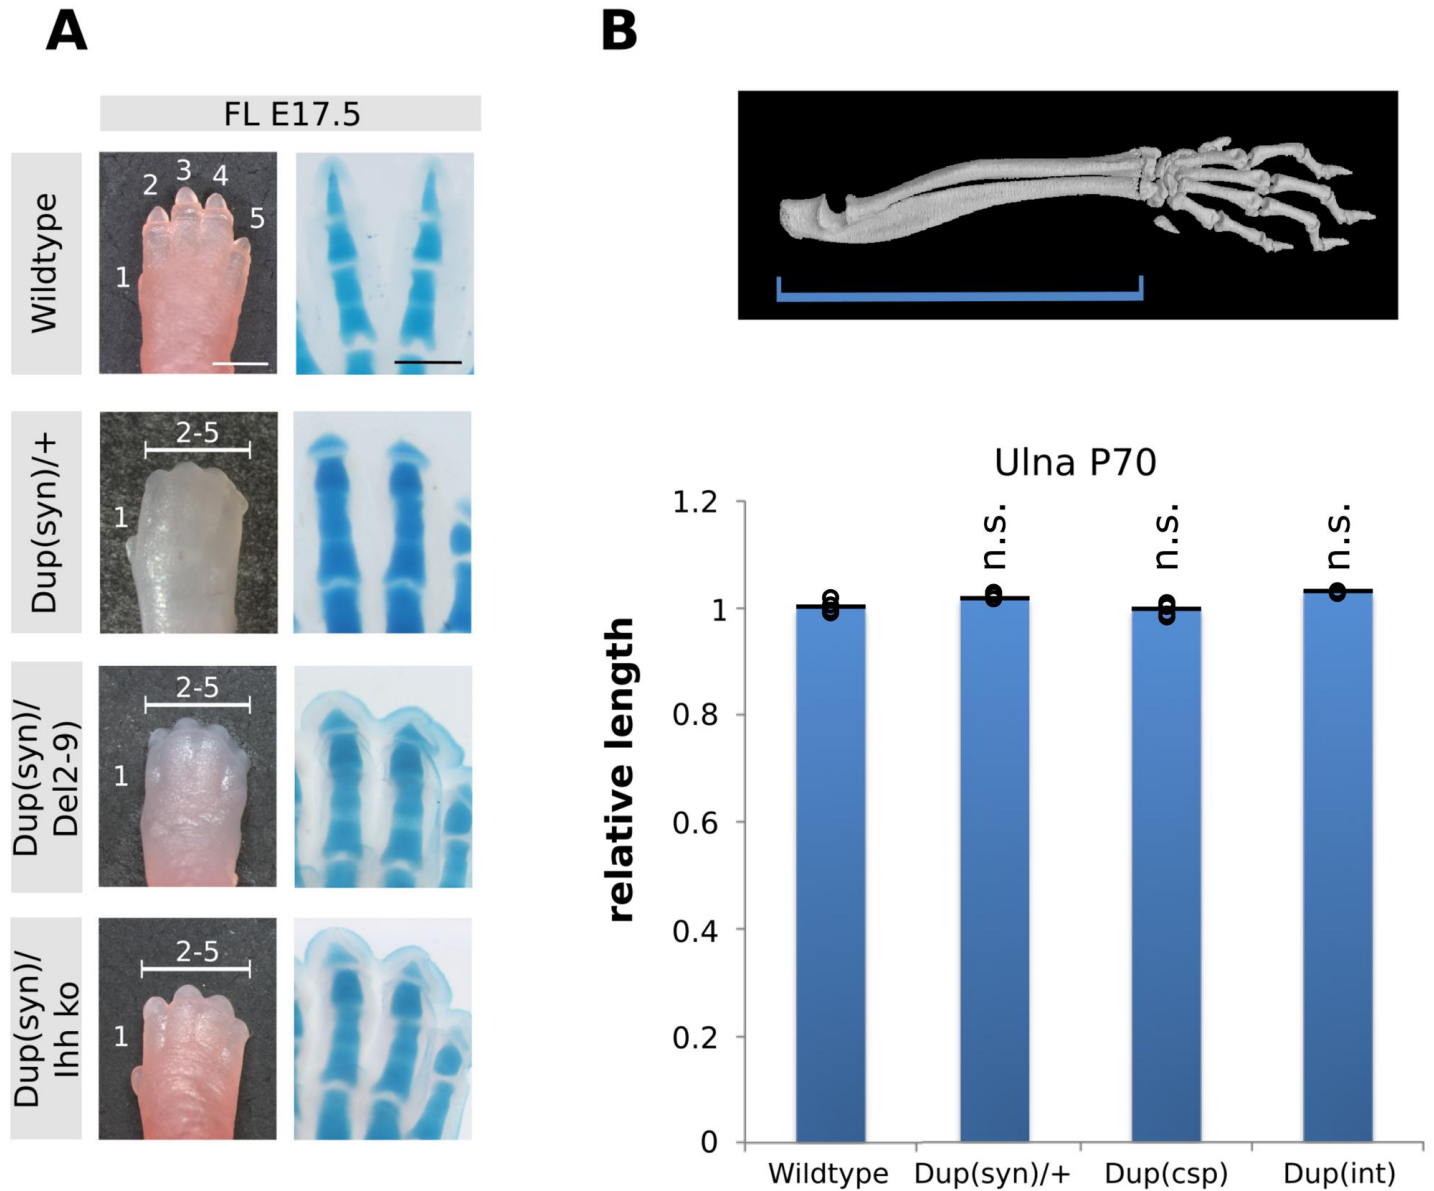

Supplementary Figure 9

**Limb abnormalities of Dup(syn) mice do not result from increased copies of *Ihh* gene.**

(A) Forelimb morphology of duplications. Dup(syn)/+ mice (3 copies of *Ihh* gene) display 2/5 syndactyly. Skeletal stainings (right) show short and broad terminal phalanges. Dup(syn) mice were crossed to Del(2-9) or *Ihh* ko in order to have only 2 functional copies of *Ihh*, both in the duplicated allele. In both cases compound heterozygous displayed the same phenotypical effects. Bars represent 1000 $\mu$ m for P7 and 500 $\mu$ m for E17.5 autopods. (B)  $\mu$ CT analysis of wt mouse forelimb at P70 displaying the different regions used for measurement. None of the mutant mice displayed alterations in bone length. Bars represent mean of  $n \geq 3$  different individuals (circles). Two-sided Student's *t* test, \* $P < 0.05$ ; \*\* $P < 0.01$ ; \*\*\* $P < 0.001$ ; \*\*\*\* $P < 0.0001$ ; ns, not significant.

## SUPPLEMENTARY TABLES

| Construct | E14.5            |            |          | E17.5            |          |               |
|-----------|------------------|------------|----------|------------------|----------|---------------|
|           | Embryos analysed | Fingertips | Digits   | Embryos analysed | Skulls   | Growth Plates |
| i1        | 9                | 0          | 1        | 8                | <b>3</b> | <b>7</b>      |
| i2        | 9                | 0          | 0        | 10               | 1        | <b>3</b>      |
| i3        | 7                | 0          | 0        | 5                | <b>2</b> | <b>4</b>      |
| i4        | 6                | 0          | 0        | 11               | <b>2</b> | <b>10</b>     |
| i5        | 5                | <b>3</b>   | <b>3</b> | 7                | <b>3</b> | <b>5</b>      |
| i6        | 12               | 0          | <b>9</b> | 7                | 1        | <b>7</b>      |
| i7        | 7                | <b>2</b>   | <b>3</b> | 6                | 1        | <b>6</b>      |
| i8        | 7                | 1          | <b>4</b> | 10               | <b>5</b> | <b>10</b>     |
| i9        | 5                | 0          | 0        | 6                | 1        | <b>5</b>      |

### Supplementary Table 1: Tissue-specific activity of enhancer elements.

Each stage shows total number of embryos analyzed for each construct as well as those displaying positive staining for the corresponding tissue. Positive scoring is indicated in bold.

| Construct          | Genomic Position           | Size | Guide  | Sequence                 |
|--------------------|----------------------------|------|--------|--------------------------|
| Del(2-9), Dup(int) | Chr1:75,015,710-75,091,187 | 75kb | N2-L1  | gagacacgtggagaattcgc-agg |
|                    |                            |      | N2-R1  | gttaccacactactacgtt-agg  |
| Del(4-6)           | Chr1:75,050,992-75,063,567 | 13kb | N4-L2  | ggacacgactttcataacac-tgg |
|                    |                            |      | N4-R2  | aatttcgggtagggcgttgg-agg |
| Del(7-9)           | Chr1:75,063,567-75,091,187 | 24kb | N4-R2  | aatttcgggtagggcgttgg-agg |
|                    |                            |      | N2-R1  | gttaccacactactacgtt-agg  |
| Del(4-9)           | Chr1:75,050,992-75,091,187 | 37kb | N4-L2  | ggacacgactttcataacac-tgg |
|                    |                            |      | N2-R1  | gttaccacactactacgtt-agg  |
| Dup(syn)           | Chr1:74,989,792-75,055,634 | 65kb | N9-L9  | agcgtggggcttttaaccgt-ggg |
|                    |                            |      | N9-R6  | ttagacacaccagtatacgg-agg |
| Dup(csp)           | Chr1:75,005,921-75,060,430 | 54kb | N10-L4 | ggggcaatctgatatagtgg-ggg |
|                    |                            |      | N10-R5 | tggcccctgaccctaggat-tgg  |

**Supplementary Table 2: Genomic rearrangements generated using CRISPR/Cas9 genome editing.**

Two sgRNAs flanking the target region were used to generate the genomic rearrangement.

| Construct                  | Genomic Position           | Size | Primer           | Sequence                                                                                       |
|----------------------------|----------------------------|------|------------------|------------------------------------------------------------------------------------------------|
| centromeric homologous arm |                            |      |                  |                                                                                                |
| SB-HR-L1                   | Chr1:75,055,877-75,058,875 | 3kb  | HR3a1-f-Sall     | tata <b>gtcgacc</b> aaagtccttgaaggaacagcagt                                                    |
|                            |                            |      | HR3a1-r-Clal     | tata <b>atcgatg</b> acatgcctctgctgtacatagttt                                                   |
| SB-HR-L2                   | Chr1:75,058,877-75,060,875 | 2kb  | HR3a2-f-F3-Clal  | tata <b>atcgatt</b> acaagcttacgaagttcctattcttcaaatagtat<br>aggaacttcagcaactcaggaagaattcctaacac |
|                            |                            |      | HR3a2-r-F3-SaclI | tata <b>ccgagg</b> tagaagttcctatactatttgaagaataggaactt<br>cttcagccctctatagaaatgga              |
| telomeric homologous arm   |                            |      |                  |                                                                                                |
| SB-HR-R                    | Chr1:75,060,877-75,063,875 | 3kb  | HR3b-f-XhoI      | tata <b>ctcgagt</b> ctataagaacacacaacaatgtgccag                                                |
|                            |                            |      | HR3b-r-NotI      | tata <b>gcggccgc</b> actgttctgggtgaaccagaaatctt                                                |

**Supplementary Table 3: Homologous arms cloned for the insertion of the SB cassette.**

Cloning of the centromeric arm (total size 5kb) was performed in two steps (constructs SB-HR-L1 and SB-HR-L2). Restriction sites are shown in italic/bold.

| Element | Vista ID | Primer forward, reverse                                  | Genomic Position (mm9)     | Size (bp) |
|---------|----------|----------------------------------------------------------|----------------------------|-----------|
| i1      | mm1142   | ctcagtgtctcaaccacttgaa,<br>ctctgcatgacttcttgta           | chr1:75,008,008-75,012,847 | 4840      |
| i2      | mm1143   | ggtgggattaatctctgactg,<br>ggtgatgaacagcagtatggaa         | chr1:75,023,290-75,026,536 | 3247      |
| i3      | mm1148   | tctcccagacaaaatgcttat,<br>aacctgacctcatgaagtta           | chr1:75,046,263-75,049,025 | 2763      |
| i4      | mm1144   | cagactggagttcacagagtgc,<br>actcaggcacaagtctagcaca        | chr1:75,051,762-75,053,663 | 1902      |
| i5      |          | cctctgtgctcttgagttagactac,<br>cctccttgctagttcttacctaaaga | chr1:75,053,880-75,055,928 | 2045      |
| i6      | mm1145   | tccttgagagactccagaaagg,<br>tccccatatcagatgtttacc         | chr1:75,059,085-75,064,020 | 4936      |
| i7      | mm1146   | gtactgggaaaaatggcaagag,<br>ctgaaaggggttagaaggact         | chr1:75,068,299-75,072,430 | 4132      |
| i8      |          | ttgaggcagaaggattgtcata,<br>agccagaggtcaacatttgagt        | chr1:75,075,786-75,080,268 | 4483      |
| i9      | mm1439   | gctgagatgaatgacagtgagg,<br>gtcacacctgatgatctgcatt        | chr1:75,085,302-75,089,234 | 3933      |

**Supplementary Table 4: Genomic regions tested for enhancer activity.**

| Primer                    | Sequence                |
|---------------------------|-------------------------|
| <i>Gapdh</i> -F           | GGGAAGCCCATCACCATCTT    |
| <i>Gapdh</i> -R           | CGGCCTCACCCATTG         |
| <i>Ihh</i> -F             | GCCGACCGCCTCATGAC       |
| <i>Ihh</i> -R             | CATGACAGAGATGGCCAGTGA   |
| <i>Nhej1</i> -F (exon3+4) | TGAAGACAGAGCCATTTGAAGA  |
| <i>Nhej1</i> -R (exon3+4) | GCTTTCATCACCAACAGCA     |
| <i>Nhej1</i> -F (exon2+3) | CATTGCTTCGGATGAAGGACC   |
| <i>Nhej1</i> -R (exon2+3) | TCAATCGACTTCGGCTCAG     |
| <i>Cnppd1</i> -F          | CCTATTCGCCGACTCCAGAAA   |
| <i>Cnppd1</i> -R          | CATTCGTCATTGAAGACCTCCTC |
| <i>Fam134a</i> -F         | CACAAACATGACAAGAGAAAGCG |
| <i>Fam134a</i> -R         | AGCTCAGAGTCTGTAATAGCCA  |

**Supplementary Table 5: qPCR primer sequences.**

| Viewpoint           | 1 <sup>st</sup> primer (5' – 3') | Genomic Position           | 2 <sup>nd</sup> primer (5' – 3') | Genomic Position           |
|---------------------|----------------------------------|----------------------------|----------------------------------|----------------------------|
| <i>lhh</i> promoter | ACAGCTGGGGACCCTATAC              | chr1:74,998,765-74,998,783 | CCCGTCAGGAGGACAATC               | chr1:75,059,837-75,059,854 |

**Supplementary Table 6: 4C-seq primer sequences.**

For reference, the mm9 mouse genome was used.
